# Supplementary material for: Application of a Low Transition Temperature Mixture for the Dispersive Liquid–Liquid Microextraction of Illicit Drugs from Urine Samples
Source: MDPI journal article supplement (doi:10.3390/molecules26175222), 2021-08-28
Supplement: s1 [file s1]

# **Application of a low transition temperature mixture for the dispersive liquid-liquid microextraction of illicit drugs from urine samples.**

**Valeria Gallo<sup>1</sup>, Pierpaolo Tomai<sup>1</sup>, Valerio Di Lisio<sup>1</sup>, Chiara Dal Bosco<sup>1</sup>, Paola D'Angelo<sup>1</sup>, Chiara Fanali<sup>2</sup>, Giovanni D'Orazio<sup>3</sup>, Ilaria Silvestro<sup>1</sup>, Yolanda Picó<sup>4</sup>, Alessandra Gentili<sup>1\*</sup>**

<sup>1</sup> Department of Chemistry, Sapienza University of Rome, P.le Aldo Moro 5

<sup>2</sup> Unit of Food Science and Nutrition, Department of Science and Technology for Humans and the Environment, Università Campus Bio-Medico di Roma, via Álvaro del Portillo 21, 00128 Rome, Italy.

<sup>3</sup> Institute for the Biological Systems, National Research Council, Via Salaria km 29,300 00015 Monterotondo (RM)

<sup>4</sup> Environmental and Food Safety Research Group of the University of Valencia (SAMA-UV), Desertification Research Centre (CIDE), CSIC-GV-UV, Moncada-Naquera Road 4.5 km, 46113 Valencia, València, Spain

\* Correspondence: [alessandra.gentili@uniroma1.it](mailto:alessandra.gentili@uniroma1.it); Tel.: +390649693230

**Table S1.** Structures, exact masses and main physicochemical characteristics of the selected illicit drugs

| Analyte       | Monoisotopic Mass | pKa  | log P | Structure                                                                            |
|---------------|-------------------|------|-------|--------------------------------------------------------------------------------------|
| BUF           | 204.12626         | 9.91 | 1.29  | 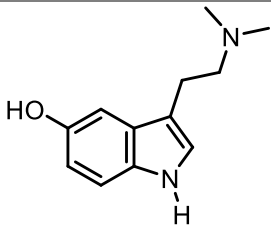   |
| KET           | 237.09204         | 7.45 | 3.35  |   |
| MDPPP         | 247.12084         | 6.80 | 2.02  |  |
| MPBP          | 231.16231         | 7.70 | 3.43  |  |
| $\alpha$ -PVP | 231.16231         | 7.90 | 3.36  |  |
| HER           | 369.15762         | 7.95 | 1.58  |  |

|          |           |       |      |                                                                                      |
|----------|-----------|-------|------|--------------------------------------------------------------------------------------|
| COD      | 299.15214 | 8.21  | 1.19 | 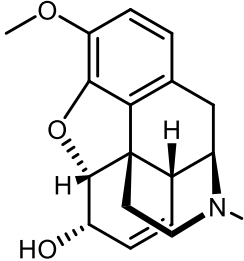   |
| MDMA     | 193.11028 | 10.14 | 1.86 |    |
| PMA      | 165.11536 | 10.00 | 1.65 |    |
| EPH      | 165.11536 | 9.52  | 1.13 |  |
| bk-MMBDB | 235.12084 | 7.10  | 2.14 |  |
| MBDB     | 207.12592 | 10.30 | 2.38 |  |
| MDPV     | 275.15214 | 7.40  | 2.99 |  |
| NAPH     | 281.17796 | 8.00  | 4.35 |  |

**Table S2.** Conditions for the preparation of some mixtures based on choline chloride and sesamol

| <b>Components</b>                               |                                              | <b>Molar ratio</b> | <b>Temperature of preparation (°C)</b> | <b>Time of preparation (min)</b> |
|-------------------------------------------------|----------------------------------------------|--------------------|----------------------------------------|----------------------------------|
| <b>Hydrogen-Bond Acceptor (HBA)<sup>a</sup></b> | <b>Hydrogen-Bond Donor (HBD)<sup>b</sup></b> |                    |                                        |                                  |
| Choline chloride                                | Sesamol                                      | 1:1                | 50                                     | 10                               |
|                                                 |                                              | 1:2                | 50                                     | 5                                |
|                                                 |                                              | 1:3                | 50                                     | 5                                |
|                                                 |                                              | 1:4                | 50                                     | 10                               |

<sup>a</sup> Melting point of ChCl: 302°C. <sup>b</sup> Melting point of Sesamol: 62°C.
